# Supplementary material
Source: PubMed Central journal article supplement (PMC6643624)
Supplement: ao8b01809_si_001.pdf [file ao8b01809_si_001.pdf]

## Supporting Information

### **Molecular Engineering and Structure-Related Properties of Squaraine Dyes based on the Core and Wings Concept**

G Hanumantha Rao,<sup>†,‡</sup> Prem Jyoti Singh Rana,<sup>†</sup> Ramesh Kumar Chitumalla,<sup>§</sup> Joonkyung Jang,<sup>\*,§</sup> Surya Prakash Singh<sup>\*,†,‡</sup>

<sup>†</sup>Polymers and Functional Materials Division, CSIR-Indian Institute of Chemical Technology, Uppal Road, Tarnaka, Hyderabad-500007, India.

<sup>‡</sup>Academy of Scientific and Innovative Research (AcSIR), CSIR- Human Resource Development Centre, (CSIR-HRDC) Campus, Kamla Nehru Nagar, Ghaziabad, Uttar Pradesh- 201002, India.

<sup>§</sup>Department of Nanoenergy Engineering, Pusan National University, Busan 46241, Republic of Korea.

**E-Mail:** Corresponding authors: [spsingh@iict.res.in](mailto:spsingh@iict.res.in) and [jkjang@pusan.ac.kr](mailto:jkjang@pusan.ac.kr)

## CONTENTS

|                                                                                          |     |
|------------------------------------------------------------------------------------------|-----|
| <b>Figure S1.</b> $^1\text{H}$ NMR spectra of <b>2</b> in $\text{CDCl}_3$ .              | S3  |
| <b>Figure S2.</b> $^{13}\text{C}$ NMR spectra of <b>2</b> in $\text{CDCl}_3$ .           | S3  |
| <b>Figure S3.</b> $^1\text{H}$ NMR spectra of <b>SQ-2Br</b> in $\text{CDCl}_3$ .         | S4  |
| <b>Figure S4.</b> $^{13}\text{C}$ NMR spectra of <b>SQ-2Br</b> in $\text{CDCl}_3$ .      | S4  |
| <b>Figure S5.</b> $^1\text{H}$ NMR spectra of <b>SQ-2CHO</b> in $\text{CDCl}_3$ .        | S5  |
| <b>Figure S6.</b> $^{13}\text{C}$ NMR spectra of <b>SQ-2CHO</b> in $\text{CDCl}_3$ .     | S5  |
| <b>Figure S7.</b> $^1\text{H}$ NMR spectra of <b>SQ-DICN</b> in $\text{CDCl}_3$ .        | S6  |
| <b>Figure S8.</b> $^{13}\text{C}$ NMR spectra of <b>SQ-DICN</b> in $\text{CDCl}_3$ .     | S6  |
| <b>Figure S9.</b> $^1\text{H}$ NMR spectra of <b>SQ-DIEt-RH</b> in $\text{CDCl}_3$ .     | S7  |
| <b>Figure S10.</b> $^{13}\text{C}$ NMR spectra of <b>SQ-DIEt-RH</b> in $\text{CDCl}_3$ . | S7  |
| <b>Figure S11.</b> $^1\text{H}$ NMR spectra of <b>SQ-DICN-RH</b> in $\text{CDCl}_3$ .    | S8  |
| <b>Figure S12.</b> $^{13}\text{C}$ NMR spectra of <b>SQ-DICN-RH</b> in $\text{CDCl}_3$ . | S8  |
| <b>Figure S13.</b> ESI-Mass spectrum of <b>SQ-DICN</b> .                                 | S9  |
| <b>Figure S14.</b> MALDI-TOF of <b>SQ-DIEt-RH</b> .                                      | S9  |
| <b>Figure S15.</b> MALDI-TOF of <b>SQ-DICN-RH</b> .                                      | S10 |
| <b>Figure S16.</b> Absorption and photoluminescence of <b>SQ-2Br</b> .                   | S11 |
| <b>Figure S17.</b> CV and DPV of <b>SQ-2Br</b> .                                         | S11 |
| <b>Figure S18.</b> Ground state optimized structures of the SQ dyes.                     | S12 |
| <b>Figure S19.</b> Isodensity plots of the frontier molecular orbitals of the SQ dyes    | S13 |

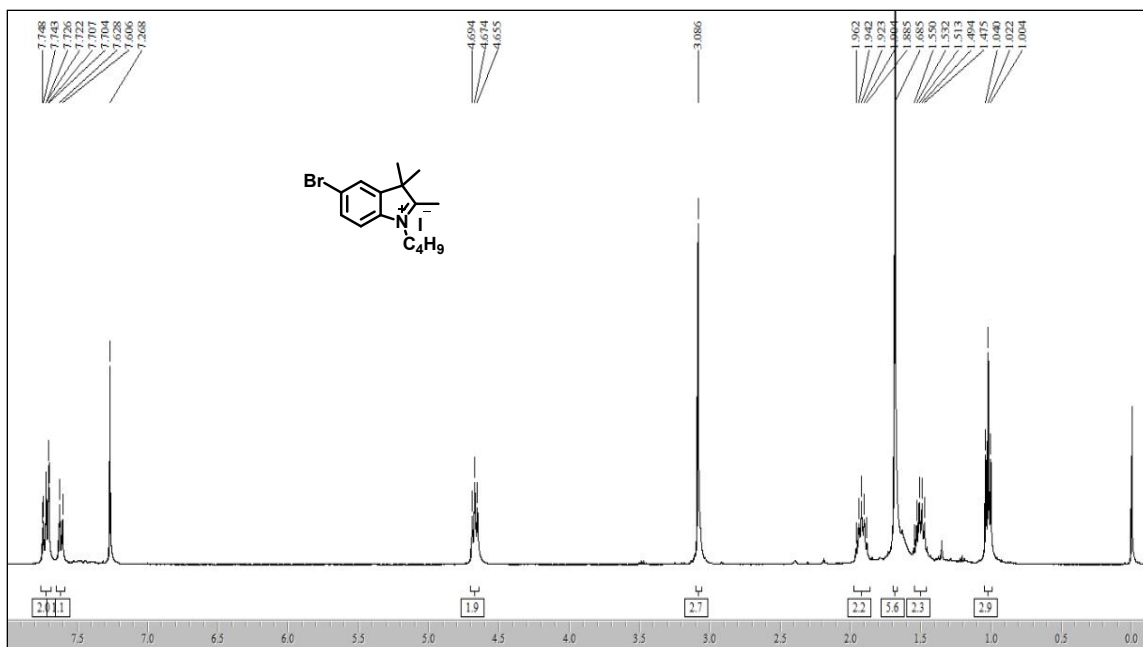

**Figure S1.** <sup>1</sup>H NMR spectra of 5-bromo-1-butyl-2,3,3-trimethyl-3*H*-indol-1-ium iodide in CDCl<sub>3</sub>.

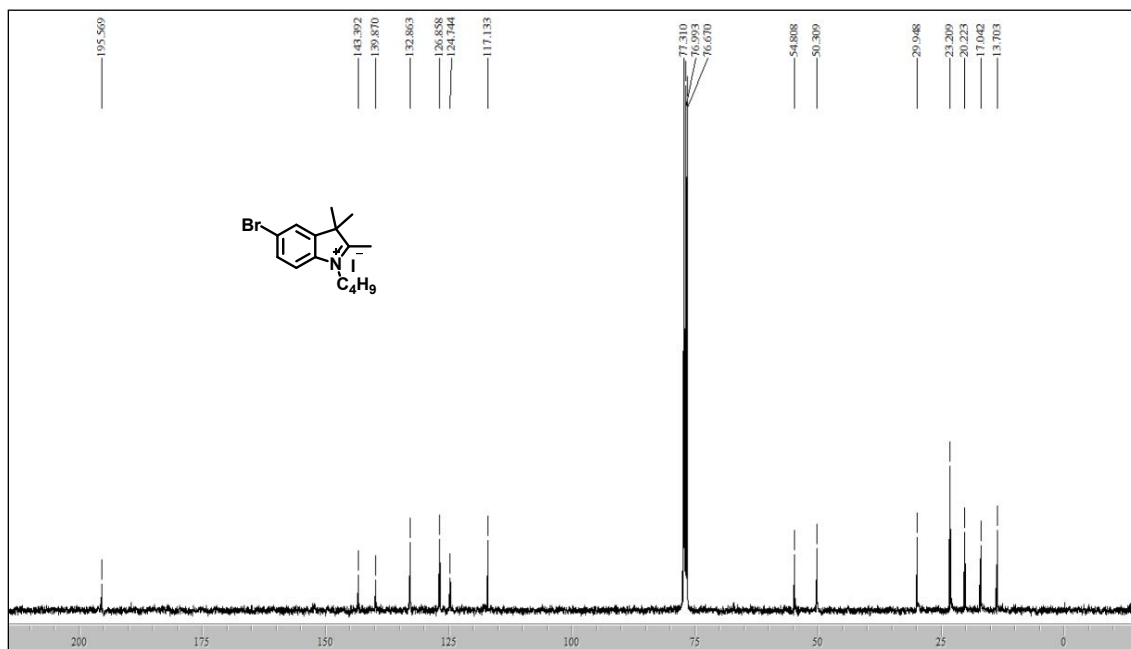

**Figure S2.** <sup>13</sup>C NMR spectra of 5-bromo-1-butyl-2,3,3-trimethyl-3*H*-indol-1-ium iodide in CDCl<sub>3</sub>.

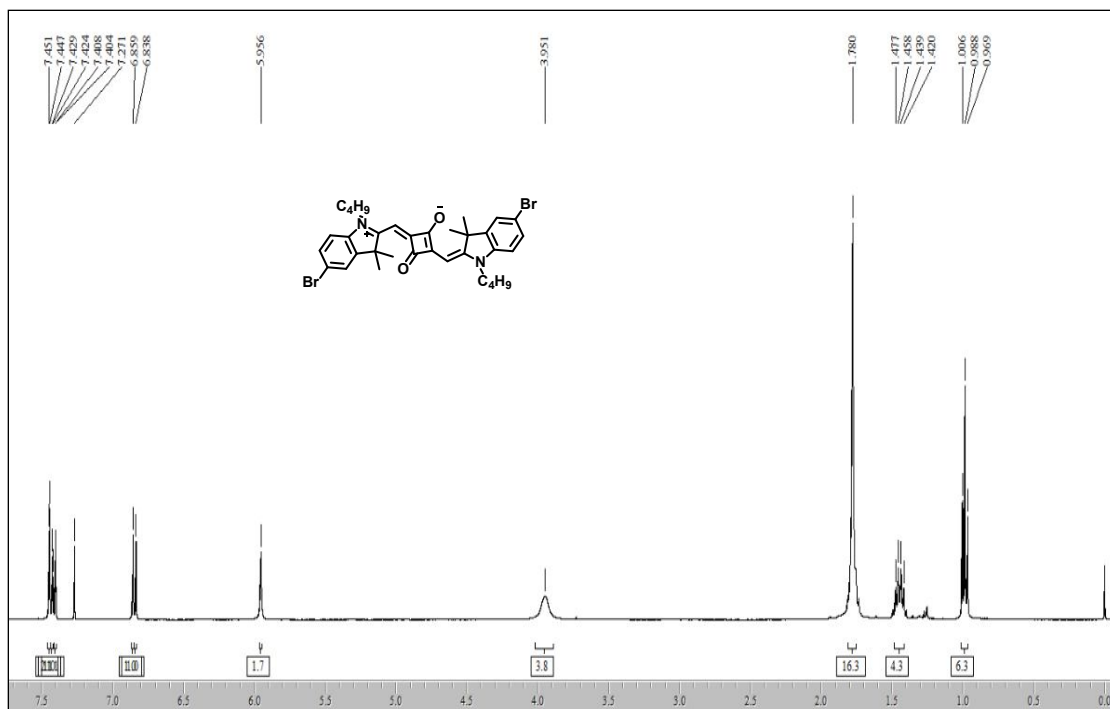

Figure S3. <sup>1</sup>H NMR spectra of SQ-2Br in CDCl<sub>3</sub>.

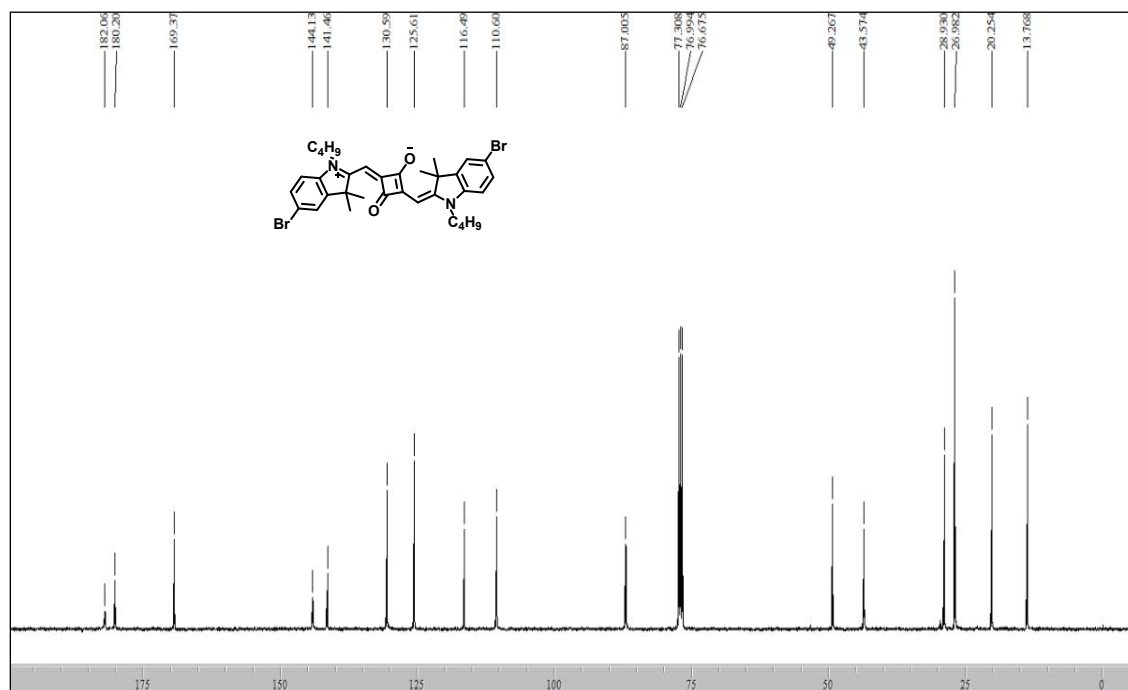

Figure S4. <sup>13</sup>C NMR spectra of SQ-2Br in CDCl<sub>3</sub>.

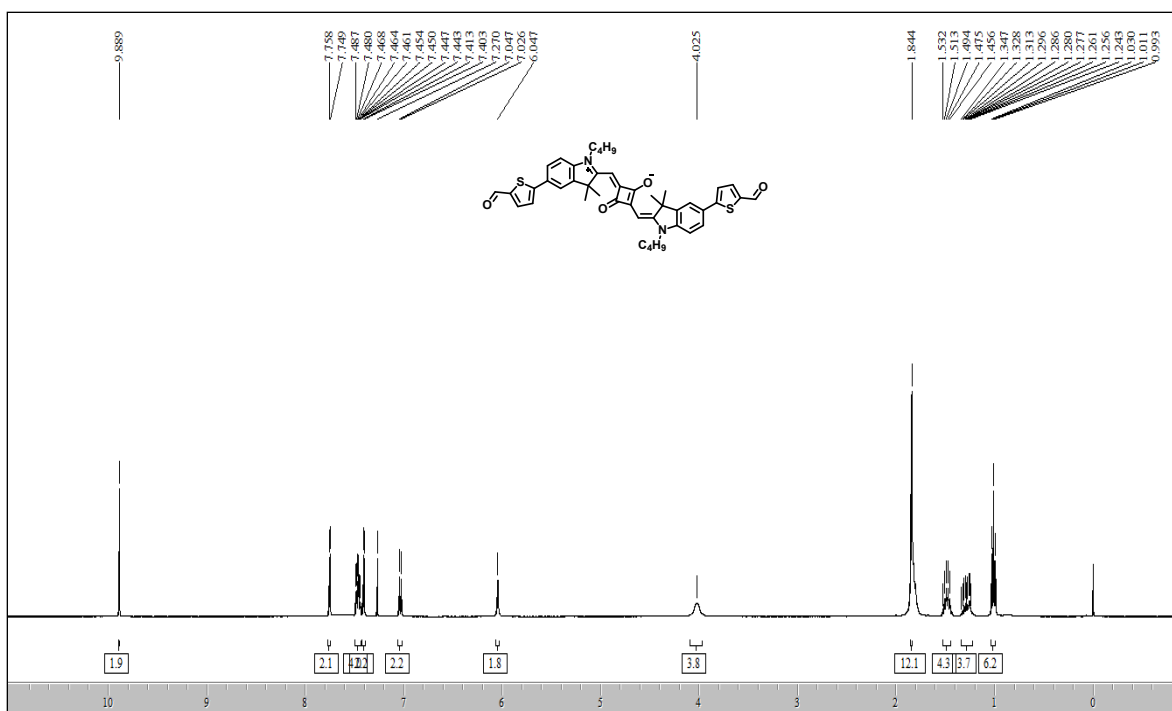

**Figure S5. <sup>1</sup>H NMR spectra of SQ-2CHO in CDCl<sub>3</sub>.**

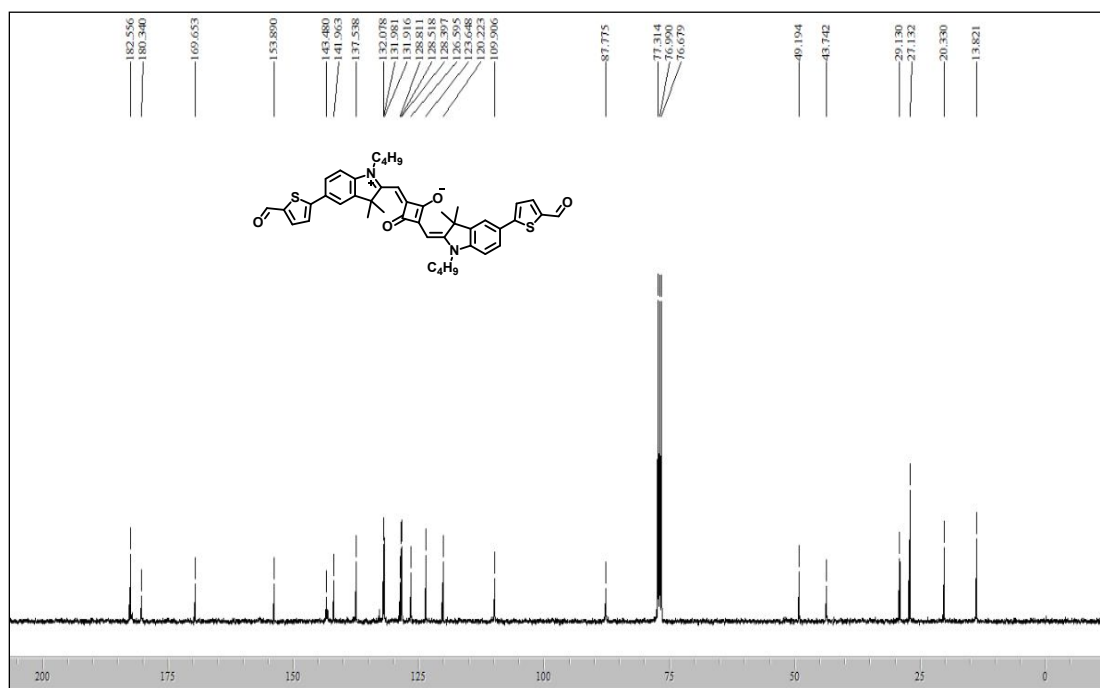

**Figure S6. <sup>13</sup>C NMR spectra of SQ-2CHO in CDCl<sub>3</sub>.**

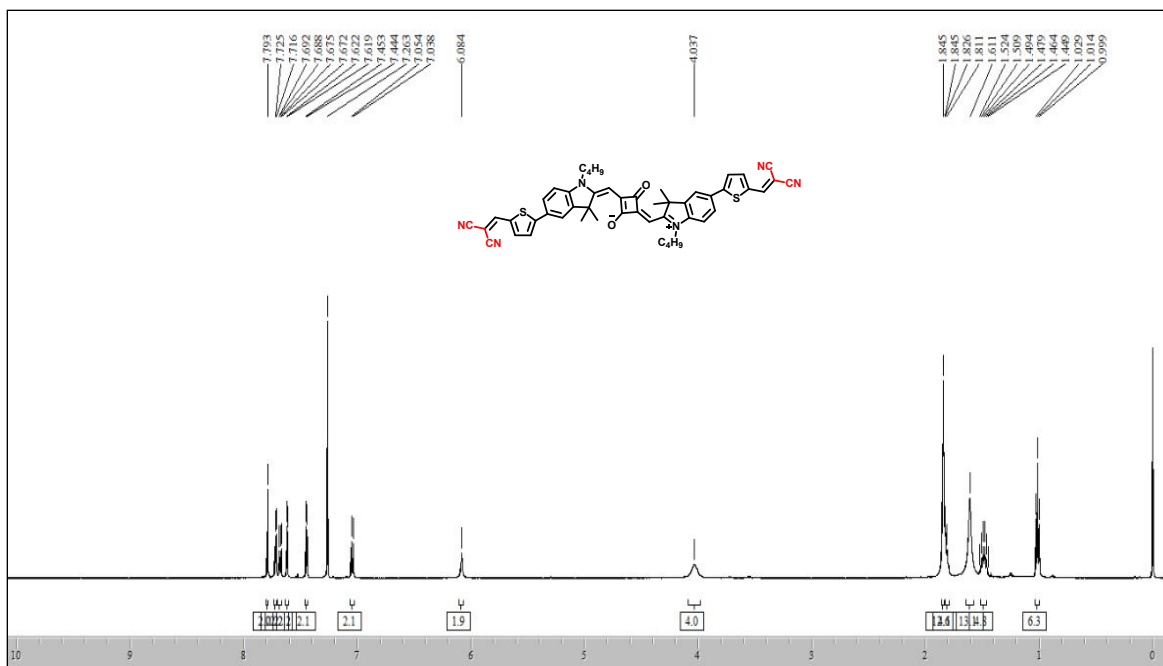

**Figure S7.**  $^1\text{H}$  NMR spectra of SQ-DICN in  $\text{CDCl}_3$ .

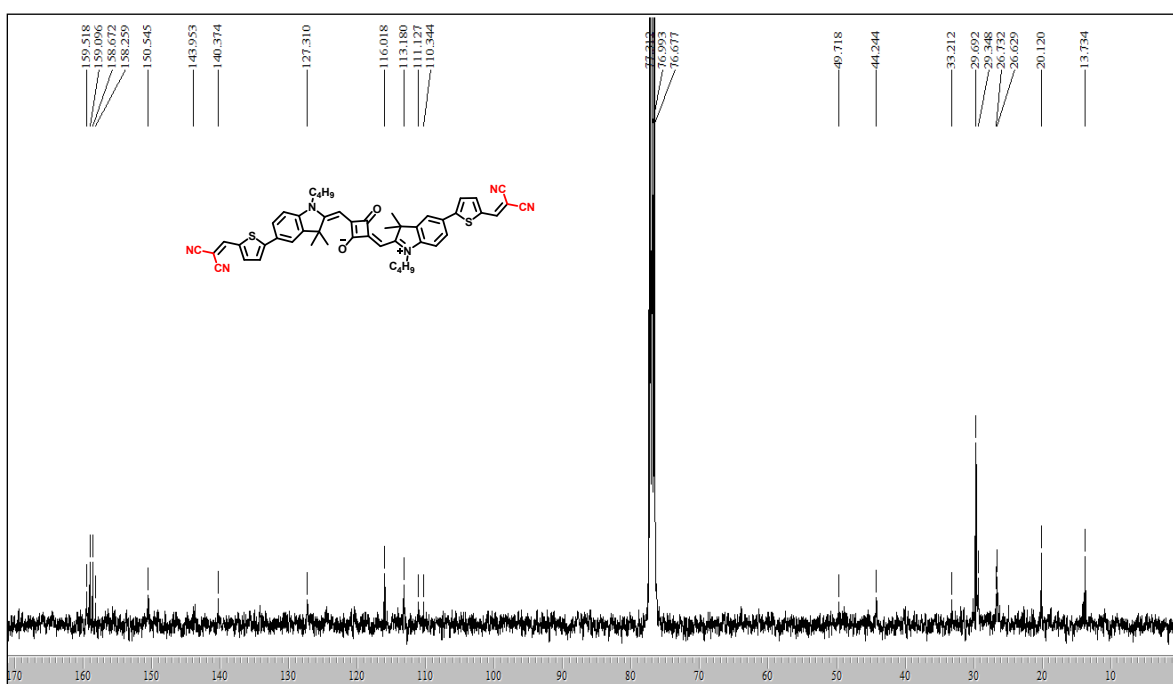

**Figure S8.**  $^{13}\text{C}$  NMR spectra of SQ-DICN in  $\text{CDCl}_3$ .

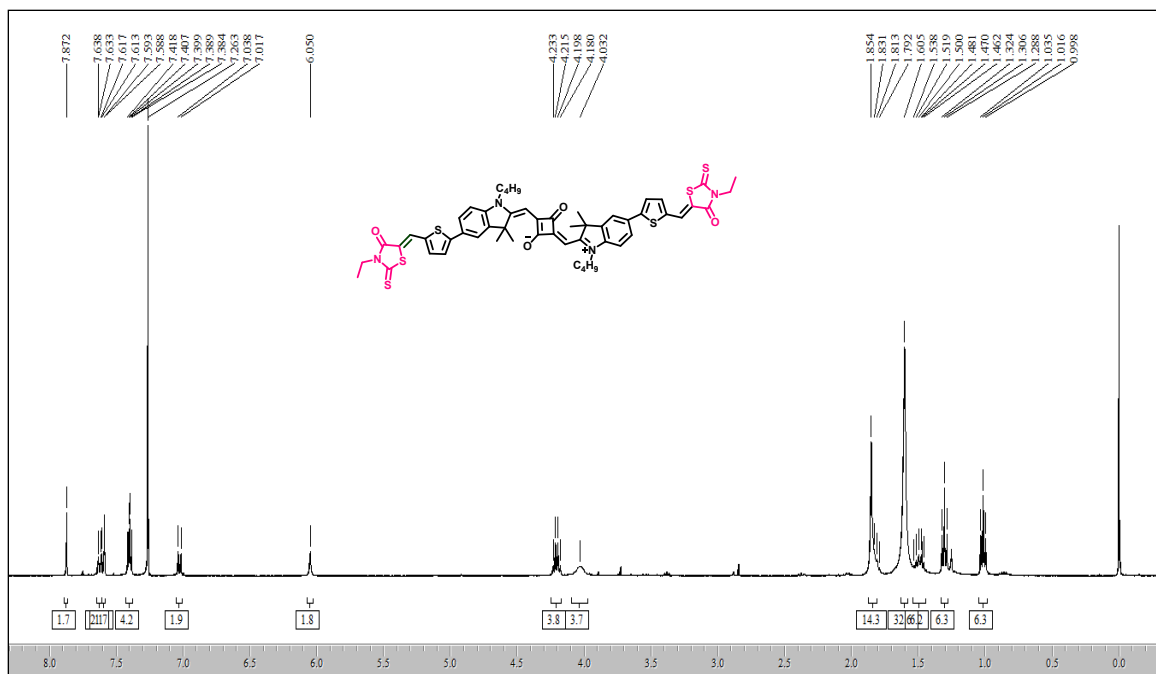

**Figure S9.** <sup>1</sup>H NMR spectra of SQ-DIEt-RH in CDCl<sub>3</sub>.

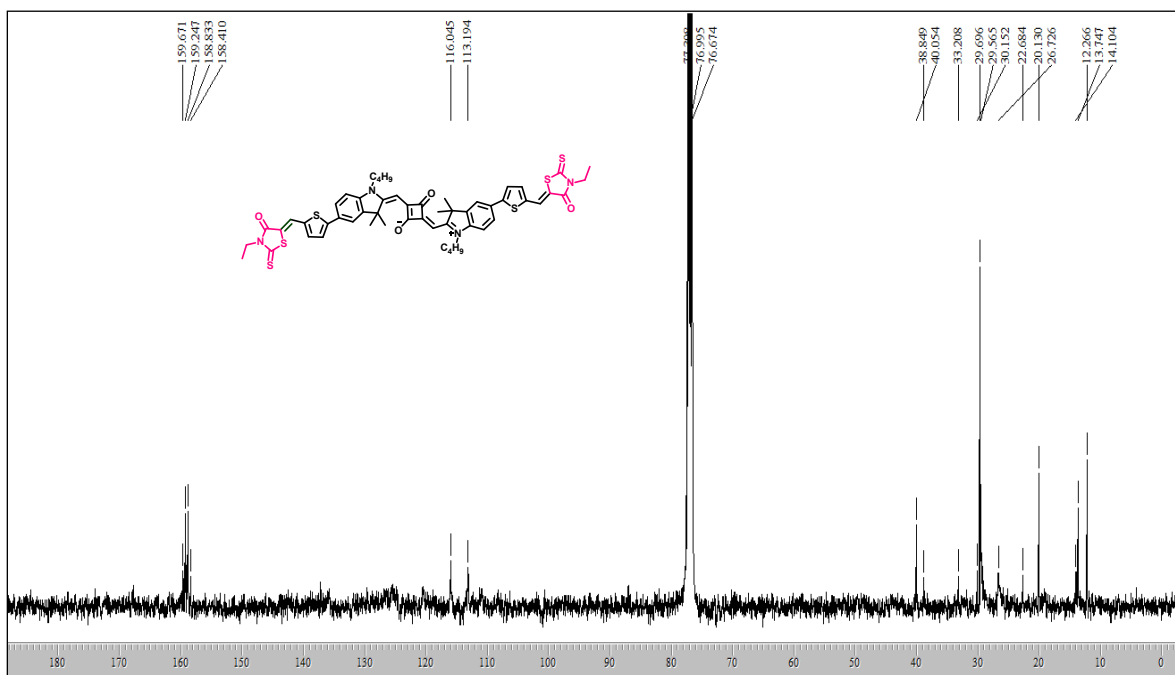

**Figure S10.** <sup>13</sup>C NMR spectra of SQ-DIEt-RH in CDCl<sub>3</sub>.

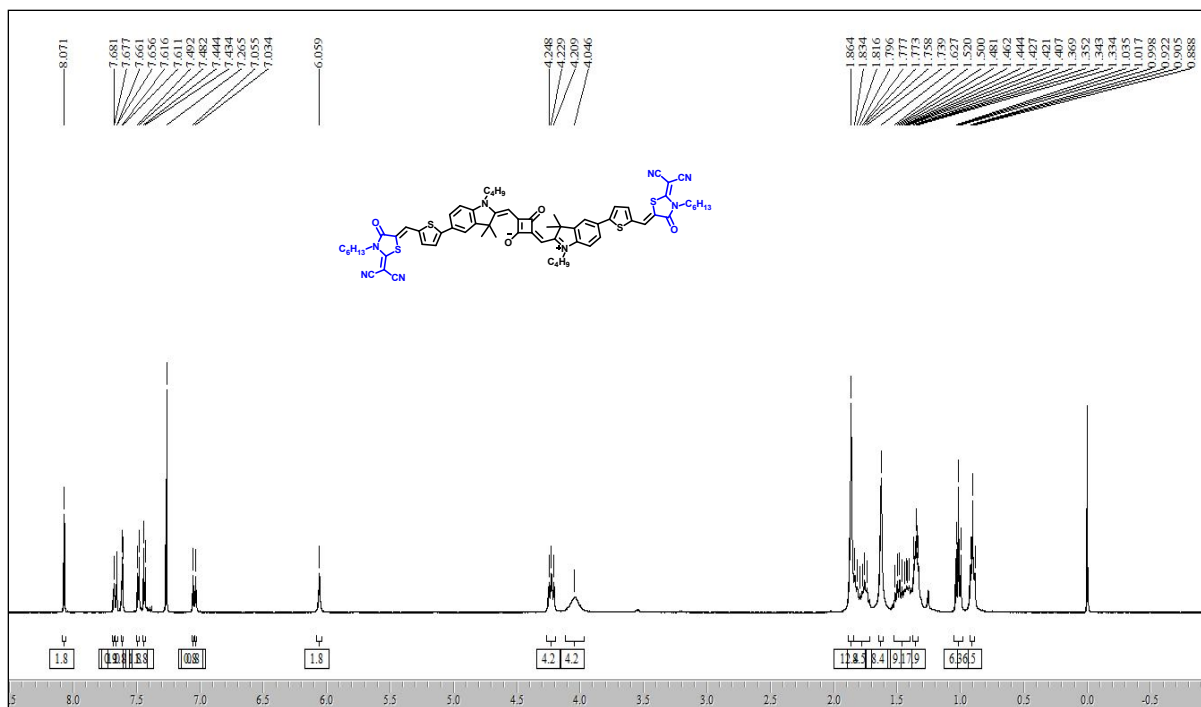

**Figure S11.**  $^1\text{H}$  NMR spectra of SQ-DICN-RH in  $\text{CDCl}_3$ .

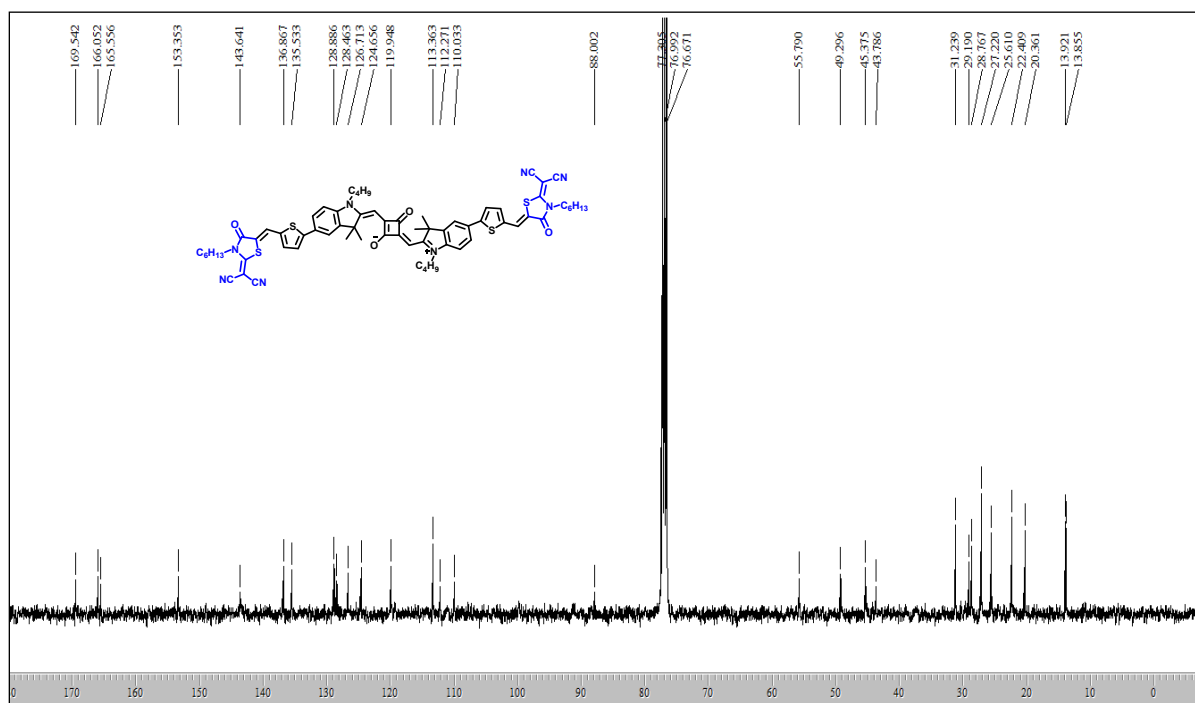

**Figure S12.**  $^{13}\text{C}$  NMR spectra of SQ-DICN-RH in  $\text{CDCl}_3$ .



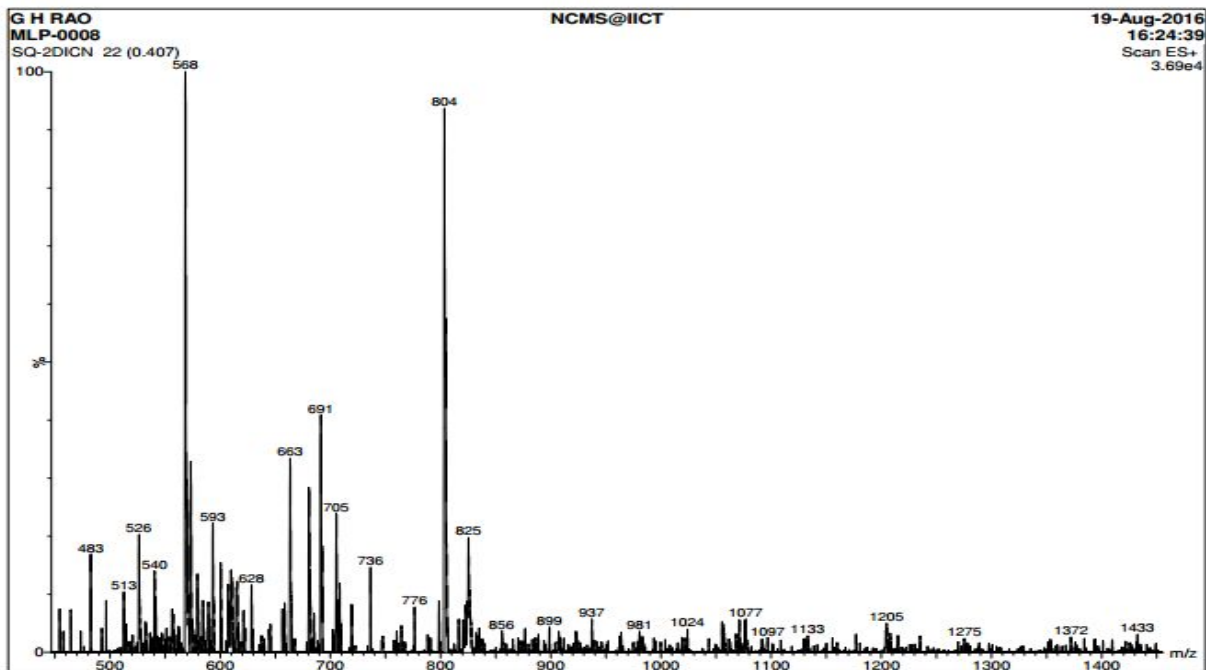

**Figure S13.** ESI-Mass spectrum of SQ-DICN.

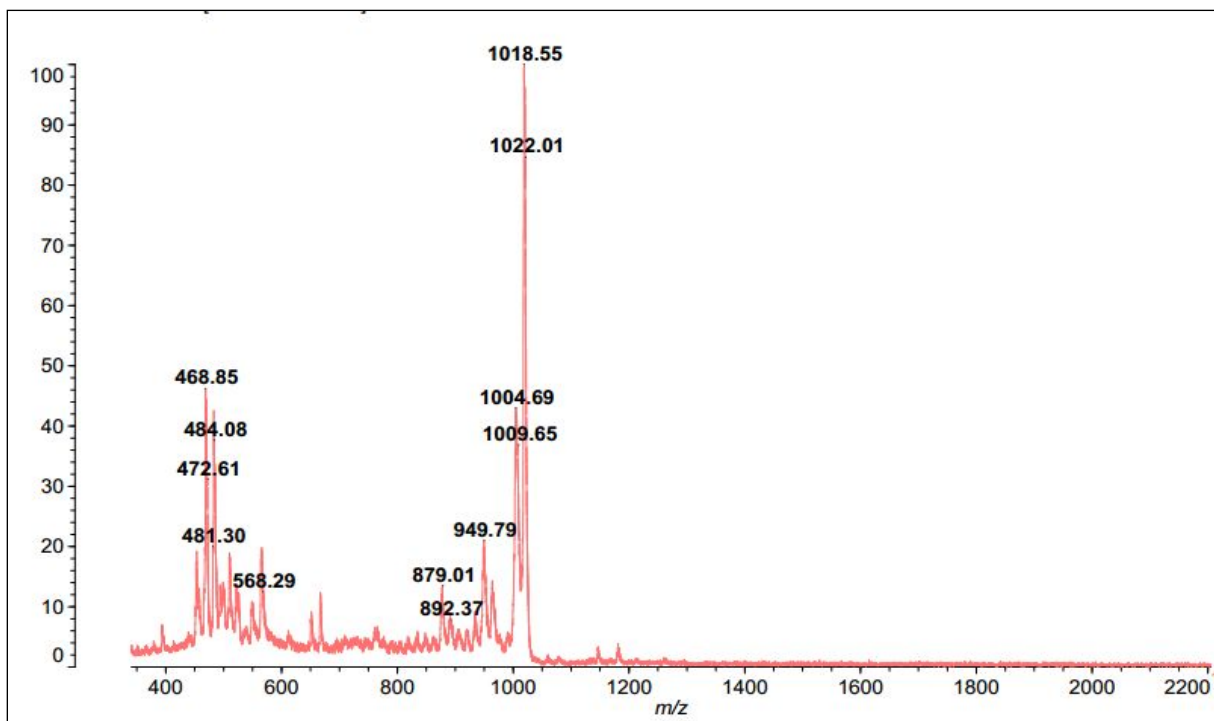

**Figure S14.** MALDI-TOF of SQ-DIEt-RH.

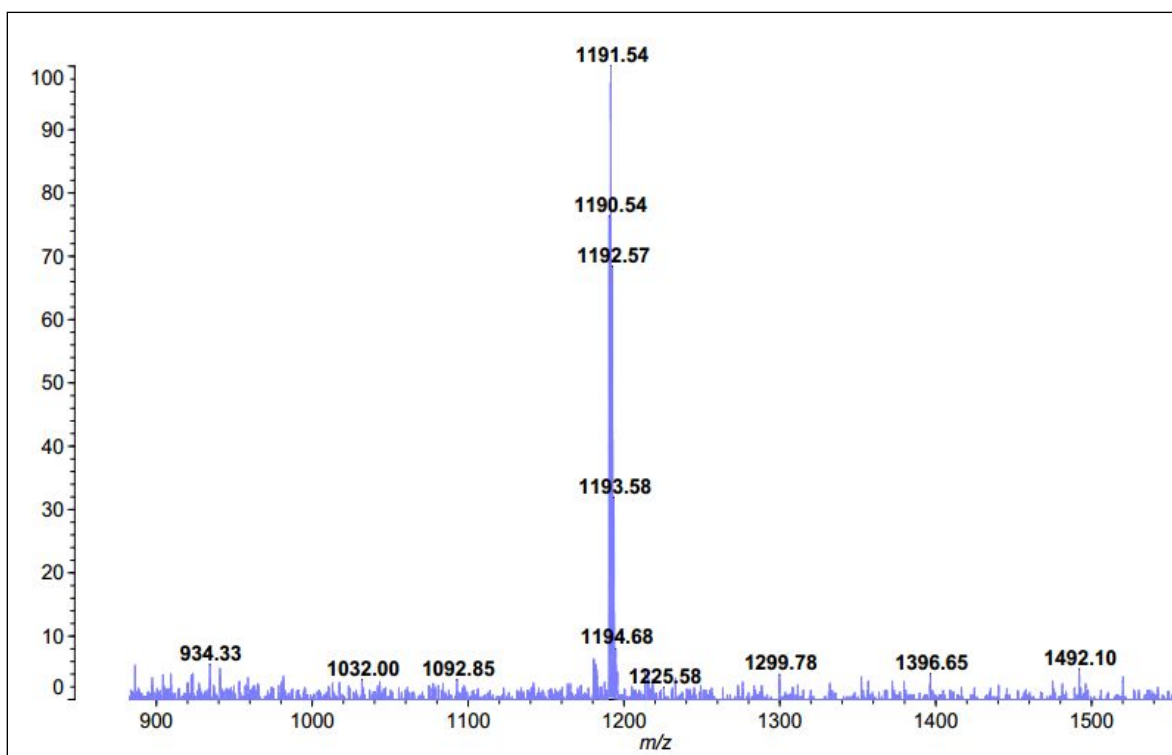

**Figure S15.** MALDI-TOF of SQ-DICN-RH.

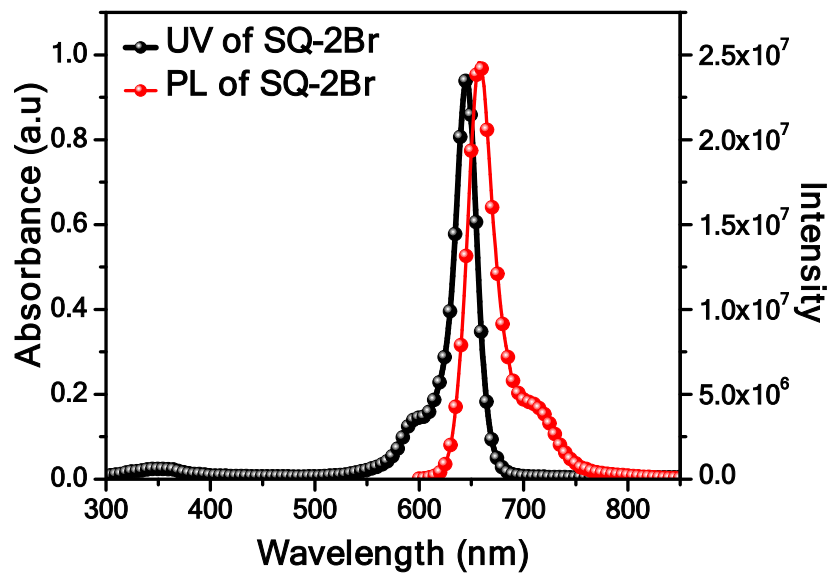

Figure S16. Absorption and photoluminescence of SQ-2Br.

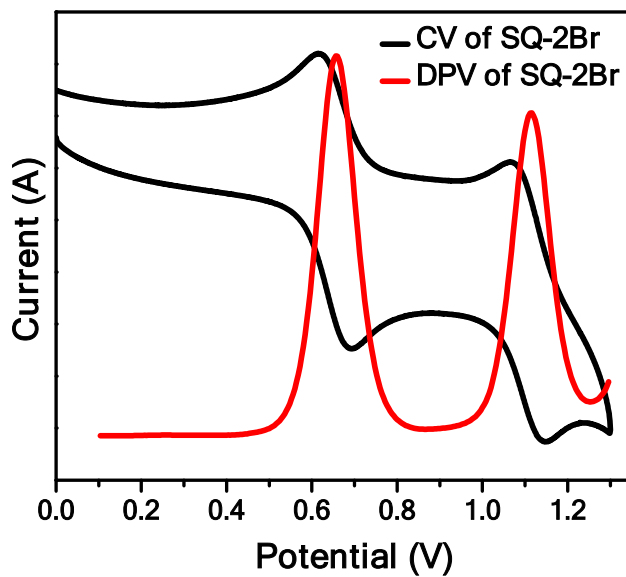

Figure S17. CV and DPV of SQ-2Br.

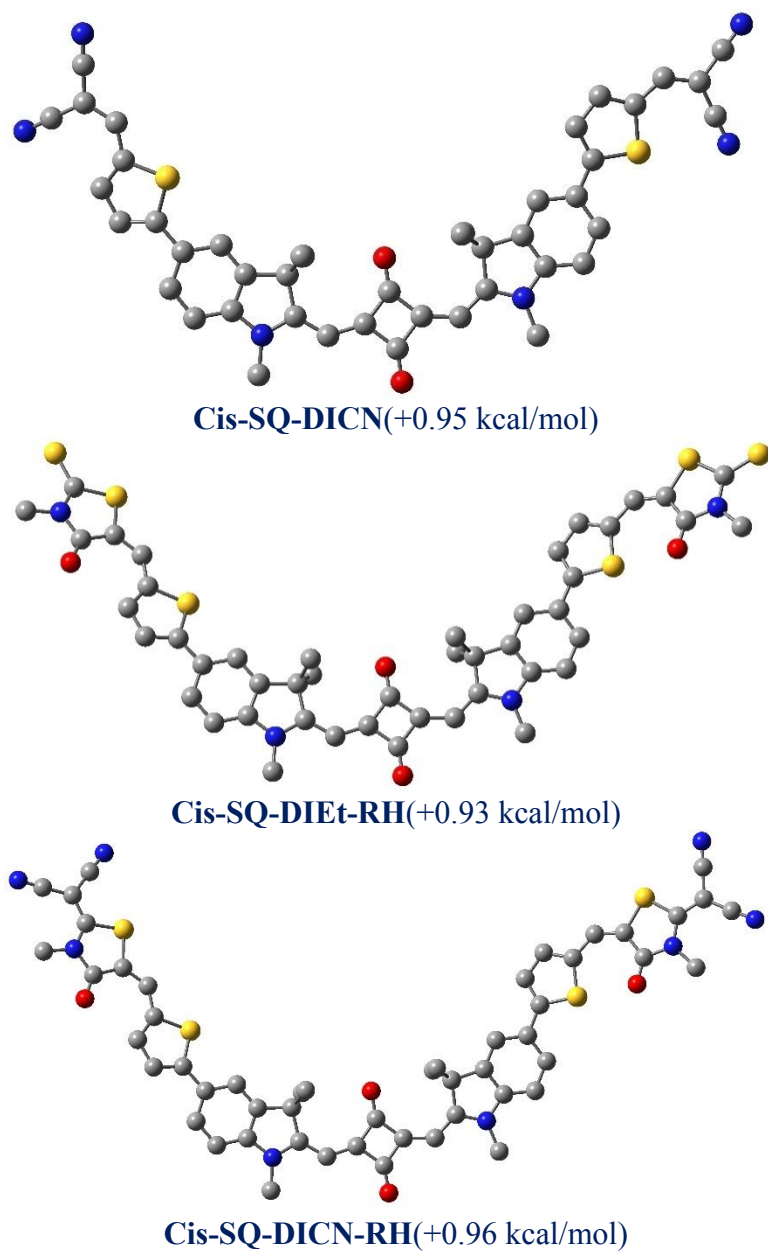

**Figure S18.** Ground state optimized structures of the SQ dyes (*cis* isomers) obtained at B3LYP/6-31G(d) level of theory. Hydrogen atoms are omitted for clarity.

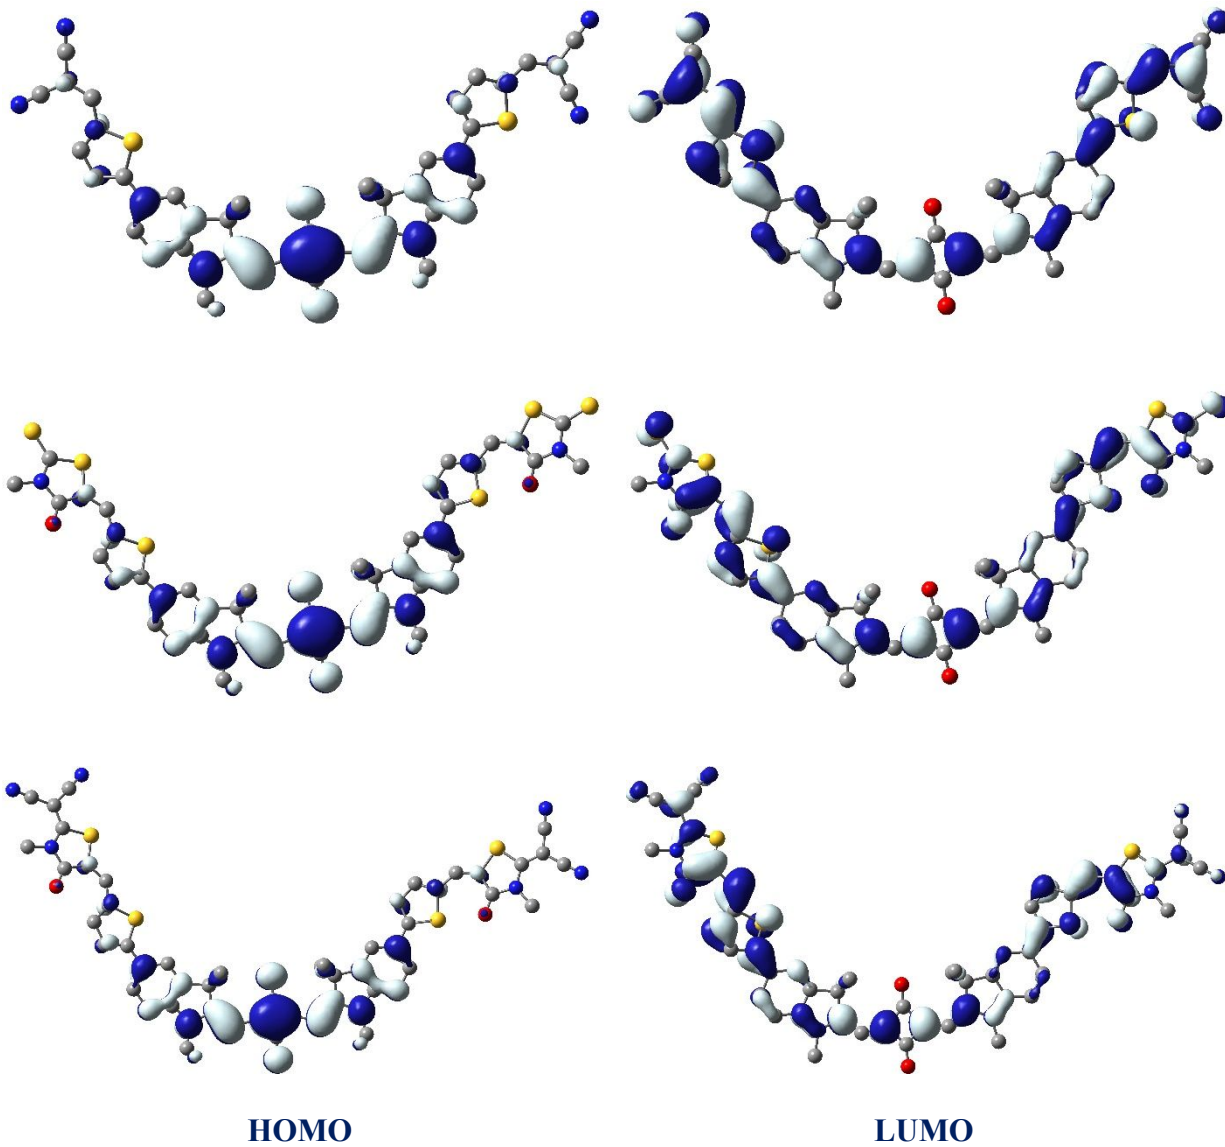

**Figure S19.** Isodensity plots (isosurface =  $0.02 \text{ e } \text{\AA}^{-3}$ ) of the frontier molecular orbitals of *cis*-SQ-DICN (top), *cis*-SQ-DIEt-RH (middle), and *cis*-SQ-DICN-RH (bottom).
